# Supplementary material
Source: PubMed Central journal article supplement (PMC10060700)
Supplement: awab320_supplementary_data.pdf [file awab320_supplementary_data.pdf]

**SUPPLEMENTAL INFORMATION FILE**

**Bacterial neurotoxic metabolites in Multiple Sclerosis cerebrospinal fluid and plasma.**

Achilles Ntranos<sup>1,2†</sup>, Hye-Jin Park<sup>2†</sup>, Maureen Wentling<sup>2</sup>, Vladimir Tolstikov<sup>3</sup>, Mario Amatruda<sup>1,2</sup>, Benjamin Inbar<sup>2</sup>, Seunghee Kim-Schulze<sup>4</sup>, Carol Frazier<sup>5</sup>, Judy Button<sup>5</sup>, Michael A. Kiebish<sup>3</sup>, Fred Lublin<sup>1</sup>, Keith Edwards<sup>5</sup>, Patrizia Casaccia<sup>1,2,5,6</sup>

**†These authors contributed equally to this work.**

**Table 1: Patient demographics and clinical characteristics.**

| Diagnosis                 | Age Years Mean (SD)      | Sex                    | BMI Mean (SD)    | Disease Duration Months Mean (SD) | Continued taking DMF                                    |
|---------------------------|--------------------------|------------------------|------------------|-----------------------------------|---------------------------------------------------------|
| Controls<br><i>n</i> = 20 | 42.5<br>(13.88)          | F: 16<br>(80%)         | 27.9<br>(5.24)   | N/A                               | N/A                                                     |
| RRMS<br><i>n</i> = 14     | 43.11<br>(8.59)          | F: 12<br>(86%)         | 27.43<br>(4.88)  | 119.1<br>(94.07)                  | At 12months: 10 (71.4%)<br>At 24 months: 8 (57.1%)      |
| SPMS<br><i>n</i> = 11     | 54.99<br>(6.43)          | F: 9<br>(82%)          | 25.39<br>(3.13)  | 374.1<br>(430.6)                  | At 12months: 9/11 (81.8%)<br>At 24 months: 8/11 (72.7%) |
| Stats<br>(cx)             | ANOVA<br><b>P=0.0095</b> | Chi-squared<br>P=0.911 | ANOVA<br>P=0.338 | Welch t test<br>P=0.14            |                                                         |

Table showing the demographic and clinical characteristics of our patient cohort. RRMS = relapsing remitting multiple sclerosis; SPMS = secondary progressive multiple sclerosis; cx = cross-sectional design; SD = standard deviation; DMF = dimethyl fumarate; *n* = number of subjects

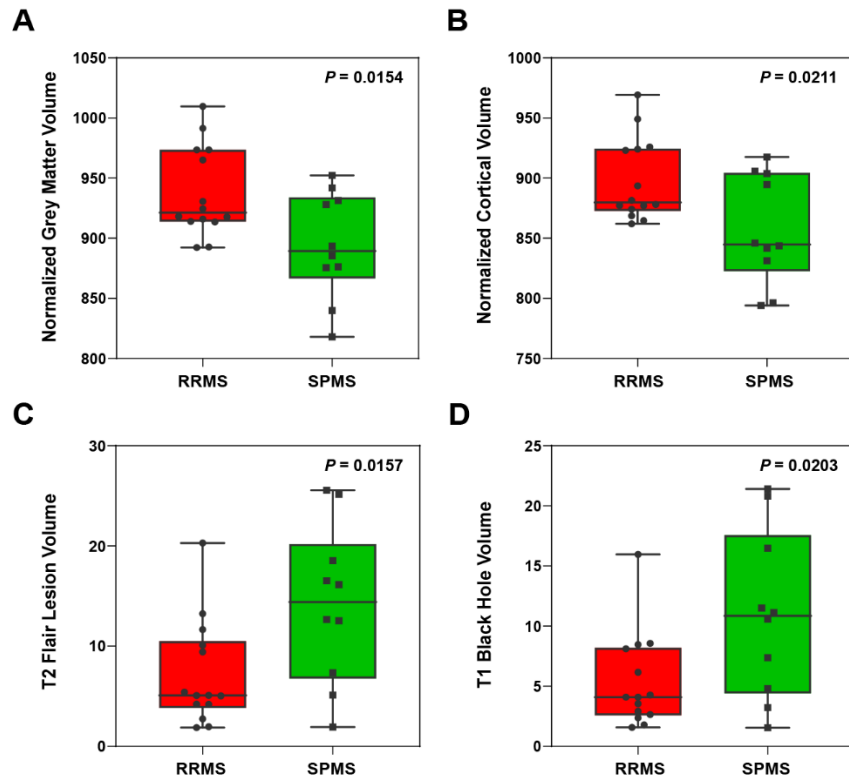

**Figure S1: MRI metrics of the patients' cohort at baseline.** Both normalized grey matter (A) and cortical volume (B) was significantly lower in SPMS patients compared to RRMS, as expected based on their disease phenotype. Furthermore, T2 flair lesion (C) and T1 black hole (D) volumes were higher in SPMS compared to RRMS patients. *P* values obtained with one-way ANOVA,  $P < 0.05$

**Table 2: Clinical data at baseline and after DMF treatment**

| Diagnosis                 | EDSS BL<br>Median<br>(Range)    | EDSS 6m<br>Median<br>(Range)                              | EDSS 12m<br>Median<br>(Range)                             | 25FTW BL<br>Median<br>(Range)      | 25FTW 12M<br>Median<br>(Range)                             | SDMT BL<br>Median<br>(Range)     | SDMT 12M<br>Median<br>(Range)                              | PASAT BL<br>Median<br>(Range)   | PASAT 12M<br>Median<br>(Range)                            |
|---------------------------|---------------------------------|-----------------------------------------------------------|-----------------------------------------------------------|------------------------------------|------------------------------------------------------------|----------------------------------|------------------------------------------------------------|---------------------------------|-----------------------------------------------------------|
| Controls<br><i>n</i> = 20 | N/A                             | N/A                                                       | N/A                                                       | N/A                                | N/A                                                        | N/A                              | N/A                                                        | N/A                             | N/A                                                       |
| RRMS<br><i>n</i> = 14     | <i>n</i> = 14<br>2<br>(1-4)     | <i>n</i> = 14<br>1.5<br>(0-3.5)                           | <i>n</i> = 14<br>1.5<br>(0-5)                             | <i>n</i> = 14<br>4.65<br>(3.7-6.7) | <i>n</i> = 10<br>4.25<br>(3.9-6.1)                         | <i>n</i> = 14<br>62.5<br>(41-76) | <i>n</i> = 10<br>64<br>(42-81)                             | <i>n</i> = 14<br>47<br>(11-60)  | <i>n</i> = 9<br>56<br>(13-66)                             |
| SPMS<br><i>n</i> = 11     | <i>n</i> = 11<br>3.5<br>(3-6.5) | <i>n</i> = 11<br>3.5<br>(2-6.5)                           | <i>n</i> = 9<br>3.5<br>(2-6.5)                            | <i>n</i> = 11<br>7<br>(3.1-18.6)   | <i>n</i> = 8<br>6.3<br>(4.3-20)                            | <i>n</i> = 11<br>47<br>(36-61)   | <i>n</i> = 8<br>51<br>(26-61)                              | <i>n</i> = 11<br>35<br>(9-53)   | <i>n</i> = 8<br>39<br>(19-49)                             |
| Stats<br>(cx)             | Welch t test<br><b>P=0.0002</b> | Welch t test<br><b>P=0.0004</b>                           | Welch t test<br><b>P=0.0050</b>                           | Welch t test<br><b>P=0.0298</b>    | Welch t test<br><i>P</i> =0.071                            | Welch t test<br><b>P=0.0007</b>  | Welch t test<br><b>P=0.0183</b>                            | Welch t test<br><b>P=0.0159</b> | Welch t test<br><i>P</i> =0.1231                          |
| Stats<br>(paired)         |                                 | BL-6m<br>RRMS: <i>P</i> =0.0978<br>SPMS: <i>P</i> =0.2763 | BL-12m<br><b>RRMS: P=0.0283</b><br>SPMS: <i>P</i> =0.7835 |                                    | BL-12m<br>RRMS: <i>P</i> =0.3844<br>SPMS: <i>P</i> =0.5281 |                                  | BL-12m<br>RRMS: <i>P</i> =0.8109<br>SPMS: <i>P</i> =0.6406 |                                 | BL-12m<br><b>RRMS: P=0.0217</b><br>SPMS: <i>P</i> =0.1824 |
| Wilcoxon signed rank test |                                 |                                                           |                                                           |                                    |                                                            |                                  |                                                            |                                 |                                                           |

Table showing the clinical data of our cohort before and after treatment with dimethyl-fumarate (DMF). RRMS: relapsing remitting multiple sclerosis, SPMS: secondary progressive multiple sclerosis, cx: cross-sectional design, paired: paired design, SD: standard deviation, DMF: dimethyl-fumarate, *n* = number of subjects; BL = baseline; 6m = 6 months; 12m = 12 months; 24m = 24 months; EDSS = Expanded Disability Status Scale; 25FTW = 25 foot timed walk; SDMT = Symbol Digit Modalities Test; PASAT = Paced Auditory Serial Addition Test.

**Table 3: Past treatments in multiple sclerosis patients.**

| Subject Number | MS Type | Treatment |           |          |        |         |       |         |         |               |
|----------------|---------|-----------|-----------|----------|--------|---------|-------|---------|---------|---------------|
|                |         | None      | Betaseron | Copaxone | Avonex | Tysabri | Rebif | Aubagio | Gilenya | Mycophenolate |
| Bio_MS-01      | RRMS    |           | Yes       | Yes      | Yes    |         |       |         |         |               |
| Bio_MS-02      | RRMS    | None      |           |          |        |         |       |         |         |               |
| Bio_MS-04      | RRMS    | None      |           |          |        |         |       |         |         |               |
| Bio_MS-05      | RRMS    | None      |           |          |        |         |       |         |         |               |
| Bio_MS-07      | RRMS    |           |           |          | Yes    |         |       |         |         |               |
| Bio_MS-10      | RRMS    | None      |           |          |        |         |       |         |         |               |
| Bio_MS-11      | RRMS    | None      |           |          |        |         |       |         |         |               |
| Bio_MS-13      | RRMS    |           |           |          |        | Yes     | Yes   | Yes     |         |               |
| Bio_MS-15      | RRMS    |           |           |          |        |         |       | Yes     |         |               |
| Bio_MS-18      | RRMS    |           |           |          | Yes    |         |       |         |         |               |
| Bio_MS-19      | RRMS    | None      |           |          |        |         |       |         |         |               |
| Bio_MS-20      | RRMS    |           |           |          | Yes    |         |       |         |         |               |
| Bio_MS-21      | RRMS    |           |           | Yes      | Yes    | Yes     | Yes   |         |         |               |
| Bio_MS-31      | RRMS    | None      |           |          |        |         |       |         |         |               |
| Bio_MS-03      | SPMS    |           | Yes       |          | Yes    |         |       |         |         |               |
| Bio_MS-06      | SPMS    | None      |           |          |        |         |       |         |         |               |
| Bio_MS-09      | SPMS    |           |           | Yes      | Yes    | Yes     | Yes   | Yes     |         |               |
| Bio_MS-12      | SPMS    |           |           |          |        |         | Yes   |         |         |               |
| Bio_MS-23      | SPMS    |           | Yes       |          |        |         |       |         | Yes     |               |
| Bio_MS-27      | SPMS    |           |           | Yes      |        |         |       |         |         |               |
| Bio_MS-28      | SPMS    |           |           | Yes      |        |         |       |         |         |               |
| Bio_MS-29      | SPMS    |           |           | Yes      | Yes    |         |       |         | Yes     |               |
| Bio_MS-32      | SPMS    |           |           |          | Yes    |         |       |         |         |               |
| Bio_MS-34      | SPMS    |           |           |          | Yes    | Yes     |       | Yes     |         |               |
| Bio_MS-35      | SPMS    |           |           | Yes      |        |         |       | Yes     |         | Yes           |

Table lists all the multiple sclerosis patients with a history of previous medical treatments.

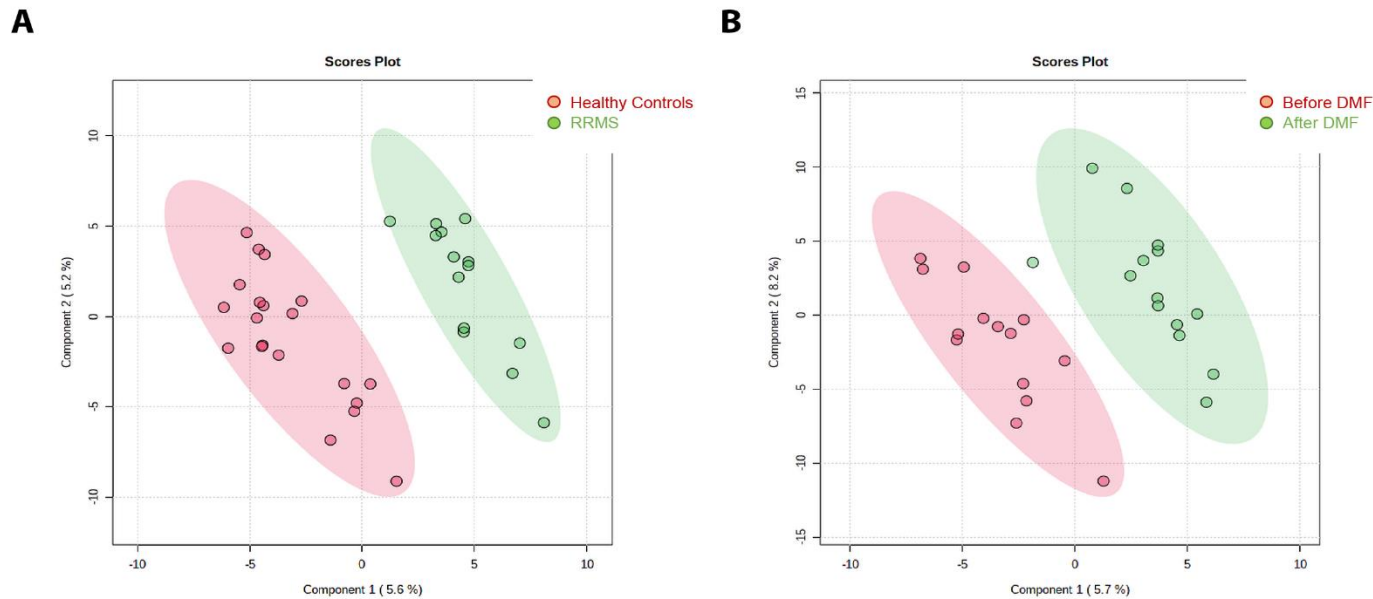

**Figure S2: PLS-DA discriminates RRMS patients from Healthy Controls based on the level of metabolites in the CSF.** (A) Scores from PLS-DA discrimination show separation of the metabolites between healthy controls (red) and RRMS (green) patients. (B) The plot shows separation of the metabolites between the baseline (red) and 6 months follow-up (green) after DMF treatment in RRMS patients. PLS-DA was performed using normalized levels of metabolites measured in the CSF. Healthy control,  $n = 20$ ; RRMS-baseline,  $n = 14$ ; RRMS-6 mos DMF,  $n = 14$ .

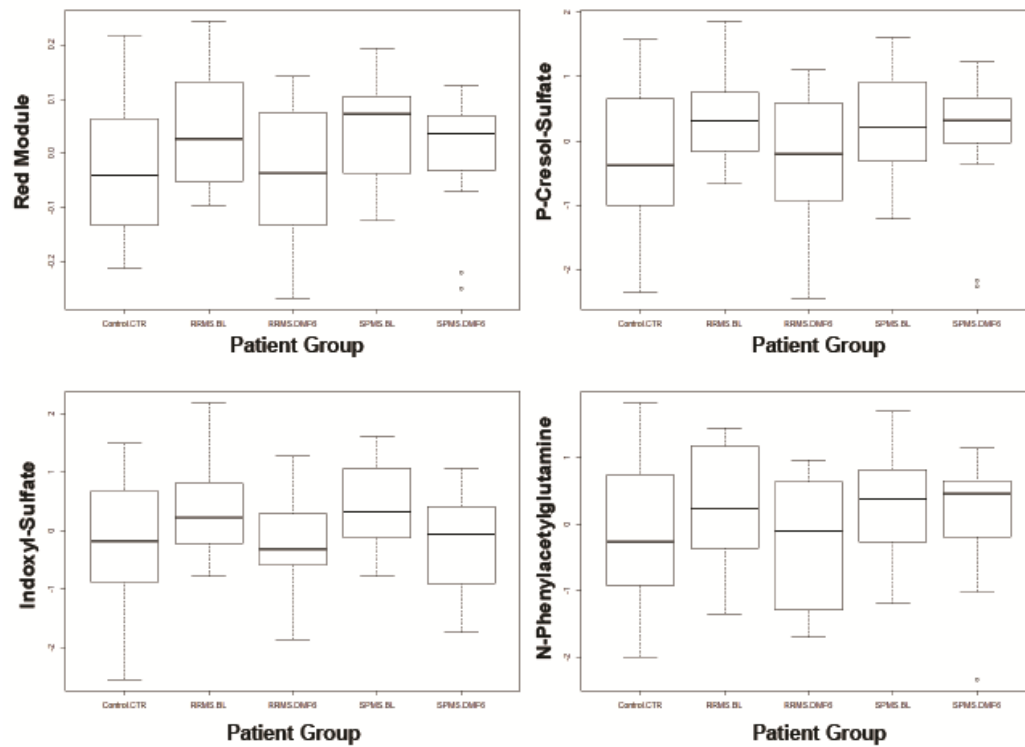

**Figure S3: The cross-sectional analysis of the red module metabolites identifies higher abundance in untreated RRMS patients compared to control subjects and are lowered by DMF treatment.** The eigenvector of the red module and the relative concentrations of the individual metabolites is shown across patient groups. A trend was observed towards higher levels in RRMS compared to control, which were normalized after treatment with DMF. CTR = Healthy control; BL = baseline; DMF6 = after 6 months of treatment with dimethyl fumarate (Linear regression controlling for age,  $P < 0.05$ ).

**Table 4: Demographics of second cohort of patients.**

| Diagnosis             | Therapy  | Age Years Mean (SD) | Sex Ratio (F:M) | Previous Treatment                                                    |
|-----------------------|----------|---------------------|-----------------|-----------------------------------------------------------------------|
| RRMS<br><i>n</i> = 11 | DMF      | 41.45<br>(9.11)     | 9 : 2           | None: 10<br>Terifluomide: 1                                           |
| RRMS<br><i>n</i> = 8  | antiCD20 | 49.38<br>(8.75)     | 5 : 3           | None: 4<br>Terifluomide: 1<br>Interferon beta-1a: 1<br>Natalizumab: 2 |

Table showing the demographics of second cohort. RRMS = relapsing remitting multiple sclerosis; SD = standard deviation; DMF = dimethyl fumarate; *n* = number of subjects; F = female; M = male



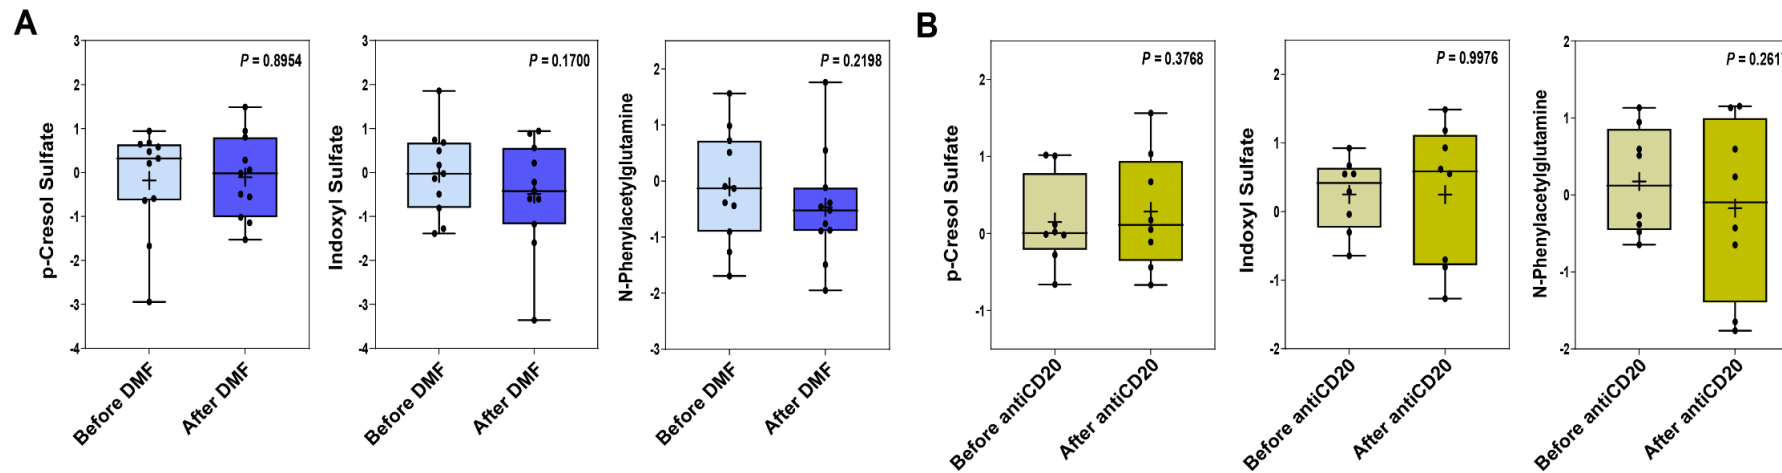

**Figure S4: Decreased levels of “red module” metabolites in plasma samples of patients with disease modifying treatments affecting the microbiota.**

Graphs shows normalized levels of p-cresol-sulfate, indoxyl sulfate and N-phenylacetylglutamine in plasma of RRMS patients undergoing either DMF treatment ( $n = 11$ ) or anti-CD20 therapy ( $n = 8$ ). (A) The result shows good agreement with the result from the first cohort, with trending towards lower abundance of each metabolite after DMF treatment. (B) However, abundance of putative neurotoxic metabolites was not decreased in plasma from patients with anti-CD20 therapy, another disease-modifying therapy not affecting the microbiota. Statistical significance was calculated by paired t-test.

**Table 5: Relative Levels of NFL in CSF at BL and after treatment in RRMS**

| <b>Diagnosis</b>         | <b>NFL BL<br/>Mean<br/>(SD)</b>     | <b>NFL 6M<br/>Mean<br/>(SD)</b>    | <b>NFL 12M<br/>Mean<br/>(SD)</b>    |
|--------------------------|-------------------------------------|------------------------------------|-------------------------------------|
| RRMS<br><i>n</i> = 14    | <i>n</i> = 10<br>587.35<br>(705.23) | <i>n</i> = 10<br>543.7<br>(637.52) | <i>n</i> = 10<br>476.23<br>(315.44) |
| Stats<br>(paired t-test) |                                     | BL-6M<br>RRMS<br><i>P</i> =0.375   | BL-12M<br>RRMS<br><i>P</i> =0.6953  |

Table showing the relative levels of neurofilament-light chain (NFL) in the cerebrospinal fluid (CSF) of patients with relapsing remitting multiple sclerosis (RRMS) at baseline (BL) and after treatment at 6 months (6M) and 12 months (12M). SD: standard deviation, N: number of subjects. *P* values of a paired t-test between baseline and 6 months (BL-6M) and baseline and 12 months (BL-12M) are shown.

**Table 6: MRI metrics at baseline and follow up**

| Diagnosis               | Normalized Grey Matter Volume | Normalized Grey Matter Volume                            | Cortical Volume    | Cortical Volume                                        | Deep Grey Volume   | Deep Grey Volume                          | T2 Flair Lesions   | T2 Flair Lesion                           | T1 Black Hole      | T1 Black Hole                             |
|-------------------------|-------------------------------|----------------------------------------------------------|--------------------|--------------------------------------------------------|--------------------|-------------------------------------------|--------------------|-------------------------------------------|--------------------|-------------------------------------------|
|                         | Baseline Mean (SD)            | 24 months Mean (SD)                                      | Baseline Mean (SD) | 24 months Mean (SD)                                    | Baseline Mean (SD) | 24 months Mean (SD)                       | Baseline Mean (SD) | 24 months Mean (SD)                       | Baseline Mean (SD) | 24 months Mean (SD)                       |
| RRMS<br><i>n</i> = 14   | 938.05<br>(37.32)             | 911.06<br>(60.52)<br><i>n</i> = 13                       | 897.74<br>(34.16)  | 873.32<br>(57.8)<br><i>n</i> = 13                      | 40.32<br>(6.4)     | 37.77<br>(9.24)<br><i>n</i> = 13          | 7.16<br>(5.2)      | 7.01<br>(5.3)<br><i>n</i> = 13            | 5.32<br>(3.9)      | 4.02<br>(3.58)<br><i>n</i> = 13           |
| SPMS<br><i>n</i> = 10   | 894.21<br>(44.3)              | 853.78<br>(53.1)<br><i>n</i> = 8                         | 857.51<br>(45.34)  | 817.96<br>(49.57)<br><i>n</i> = 8                      | 36.73<br>(8.56)    | 35.85<br>(10.8)<br><i>n</i> = 8           | 14.15<br>(7.9)     | 15.65<br>(9.09)<br><i>n</i> = 8           | 10.89<br>(6.96)    | 11.01<br>(8.68)<br><i>n</i> = 8           |
| Stats groups (ANOVA)    | <b>P=0.0154</b>               | <b>P=0.04025</b>                                         | <b>P=0.021</b>     | <b>P=0.03701</b>                                       | P=0.252            | P=0.6697                                  | <b>P=0.01574</b>   | <b>P=0.01227</b>                          | <b>P=0.02026</b>   | <b>P=0.01755</b>                          |
| Stats paired (Wilcoxon) |                               | BL-24M<br><b>RRMS: P=0.0046</b><br><b>SPMS: P=0.0156</b> |                    | BL-24M<br><b>RRMS: P=0.002</b><br><b>SPMS: P=0.031</b> |                    | BL-24M<br>RRMS: P=0.1464<br>SPMS: P=0.109 |                    | BL-24M<br>RRMS: P=0.4143<br>SPMS: P=0.156 |                    | BL-24M<br>RRMS: P=0.0803<br>SPMS: P=0.687 |

Table showing the MRI data of our cohort at baseline (BL) and after 24 months of treatment with dimethyl-fumarate (DMF). RRMS = relapsing remitting multiple sclerosis; SPMS = secondary progressive multiple sclerosis; cx = cross-sectional design; paired = paired design; SD = standard deviation; DMF = dimethyl fumarate; *n* = number of subjects

**A**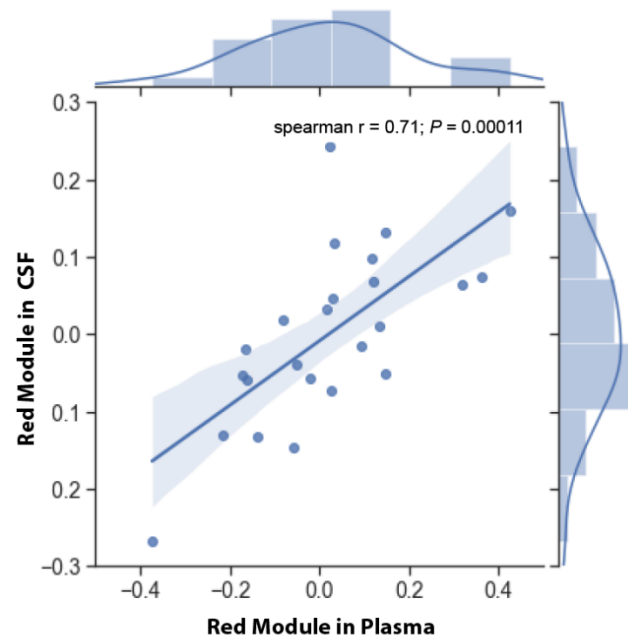**B**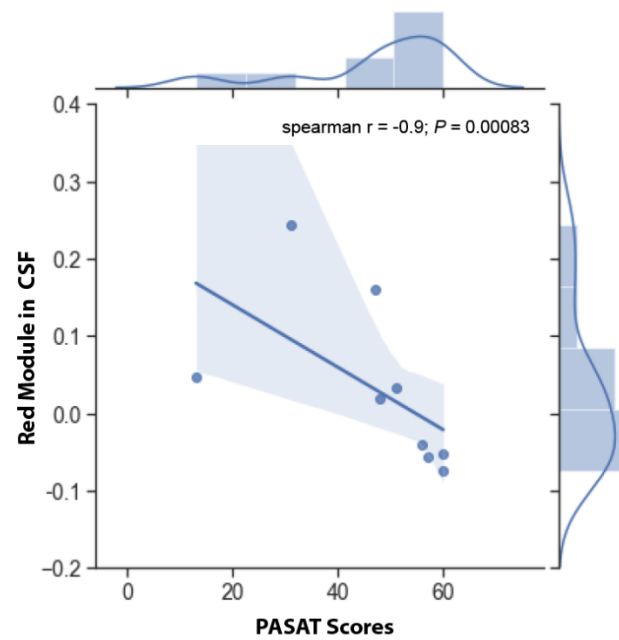

**Figure S5: Clinical correlation of red module metabolites in MS patients.** (A) The eigenvector of the red module metabolites in the CSF (y axis) and Plasma (x axis) is shown with a very high correlation, suggesting that these metabolites can cross the blood brain barrier. (B) The eigenvector of the red module metabolites in the CSF (y axis) significantly correlates with PASAT scores (x axis), a metric of cognitive function in multiple sclerosis patients. Spearman's correlation coefficient rho ( $r$ ) and associated  $P$  value are indicated.
